# Supplementary material for: Technical note: How many models do we need to simulate hydrologic processes across large geographical domains?
Source: Copernicus journal article supplement (doi:10.5194/hess-2024-279), 2024-09-18
Supplement: Supplementary file [file hess-2024-279-RC1-supplement.pdf]

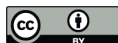

## Technical note: How many models do we need to simulate hydrologic processes across large geographical domains?

Wouter J. M. Knoben<sup>1</sup>, Ashwin Raman<sup>2</sup>, Gaby J. Gründemann<sup>1</sup>, Mukesh Kumar<sup>2</sup>, Alain Pietroniro<sup>1</sup>, Chaopeng Shen<sup>3</sup>, Yalan Song<sup>3</sup>, Cyril Thébault<sup>1</sup>, Katie van Werkhoven<sup>4</sup>, Andrew W. Wood<sup>5,6</sup>, and Martyn P. Clark<sup>1</sup>

<sup>1</sup>Schulich School of Engineering, University of Calgary, Canada

<sup>2</sup>Department of Civil, Construction, and Environmental Engineering, University of Alabama, United States of America

<sup>3</sup>Civil and Environmental Engineering, The Pennsylvania State University, United States of America

<sup>4</sup>Research Triangle Institute, United States of America

<sup>5</sup>Climate and Global Dynamics, National Center for Atmospheric Research, United States of America

<sup>6</sup>Department of Civil and Environmental Engineering, Colorado School of Mines, United States of America

**Correspondence:** Wouter J. M. Knoben (wouter.knoben@ucalgary.ca)

### Abstract.

Robust large-domain predictions of water availability and threats require models that work well across different basins in the model domain. It is currently common to express a model's accuracy through aggregated efficiency scores such as the Nash-Sutcliffe Efficiency and Kling-Gupta Efficiency, and these scores often form the basis to select among competing models.

5 However, recent work has shown that such scores are subject to considerable sampling uncertainty: the exact selection of time steps used to calculate the scores can have large impacts on the scores obtained. Here we explicitly account for this sampling uncertainty to determine the number of models that are needed to simulate hydrologic processes across large spatial domains. Using a selection of 36 conceptual models and 559 basins, our results show that model equifinality, the fact that very different models can produce simulations with very similar accuracy, makes it very difficult to unambiguously select one model over

10 another. If models were selected based on their validation KGE scores alone, almost every model would be selected as the best model in at least some basins. When sampling uncertainty is accounted for, this number drops to 4 models being needed to cover 95% of investigated basins, and 10 models being needed to cover all basins. We obtain similar conclusions for an objective function focused on low flows. These results suggests that, under the conditions typical of many current modeling studies, there is limited evidence that using a wide variety of different models leads to appreciable differences in simulation

15 accuracy compared to using a smaller number of carefully chosen models.



## 1 Introduction

### 1.1 Model selection across large geographical domains

The need for robust predictions of water availability and threats across large spatial scales (i.e., national, continental, global) requires models that work well across a variety of landscapes, discretizations, and purposes. There are two main streams of thought on how this can be achieved. The first is the idea that a single model will be able to give accurate predictions everywhere, and that the main challenges in large-domain modeling are related to our ability to parametrize, initialize, configure and run models at ever finer resolutions (e.g., Freeze and Harlan, 1969; Wood et al., 2011; Bierkens et al., 2015; Arheimer et al., 2020). The second is the idea that there are limits to our ability to measure and model the real world, suggesting that the main challenges in large-domain modeling are related to our ability to select and parametrize appropriate models for different places under varying data availability (e.g., Kirchner, 2006; Clark et al., 2011, 2016, 2017; Addor and Melsen, 2019; Horton et al., 2022). This is sometimes referred to as the “uniqueness of place” (Beven, 2000). There is a need to reconcile both points of view, and outline a path forward where the specific expertise of individuals and modeling groups can contribute to community efforts that advance our ability to predict hydrologic behavior across large geographical domains.

The first paradigm of a single model structure has both strong appeal and strong theoretical and implementation challenges. The appeal of a single model structure is that (1) a single model suggests that we have complete understanding of how the system functions everywhere, all the time; and (2) implementing and maintaining a single model is much more tractable than doing so for multiple models. However, there are three distinct theoretical and implementation challenges that limit the applicability of prediction systems that rely on a single model structure across large geographical domains:

- First, our understanding of the equations that can be used to describe hydrologic behaviour is incomplete. We do not have a single set of equations that clearly and unambiguously describe hydrologic processes, process interactions, and scaling behavior. Instead, we have many different equations for each process, and individual process parameterizations have their own assumptions, simplifications, and limitations.
- Second, despite a growing number of continentally or globally applied hydrologic models, we so far do not have a single model that contains an appropriate representation of the different hydrologic landscapes that manifest across continental domains. A rough North-to-South overview of the North American continent, for example, suggests a model there may need at least some ability to represent glaciers, permafrost, lateral snow distribution through wind and avalanches, (boreal) wetlands, surface depressions, agriculture, urban hydrology, aquifer recharge and abstraction, reservoir operation and water allocation, losing streams, fog interception and multi-story canopies. Models that simulate a number of these processes exist, with the relevant expertise about different processes scattered across different individuals and groups.



45 – Third, the heterogeneity of the landscape combined with the often limited physiographic data available complicates model configuration, parametrization and initialization. A model’s appropriate horizontal resolution and process complexity may vary in space depending on data availability.

An alternative paradigm is the “multi-model mosaic” approach (e.g., Ogden et al., 2021; Johnson et al., 2023), where different models are selected for different regions based on each model’s strengths and weaknesses. Instead of attempting to run a single model everywhere, the multi-model mosaic paradigm approaches the problem in a piecemeal fashion: use different models in different places, while ensuring that whatever model is chosen for a given place captures at least the dominant processes in that location. For example, glacier models are necessities for hydrologic modeling in the Canadian Rocky Mountains or the Himalayas but may be of limited added value for modelling across most of the low and mid-latitude regions. Similarly, accounting for tile drainage and anthropogenic infrastructure is critical in agricultural and urban regions, but of limited relevance for the sparsely populated high-latitude permafrost regions. The multi-model mosaic paradigm has practical appeal if it is able to deliver robust and actionable predictions with local relevance, at a reasonable computational cost.

The key challenge within such a paradigm is to select which model should be used for a given location. We can distinguish between two main approaches, each with their own challenges:

– First, it is possible to use detailed understanding of a specific place to refine perceptual models of that location’s hydrologic behaviour (e.g., McGlynn et al., 2002) and from such understanding derive models that strike an appropriate balance between realism and accuracy of the resulting simulations (e.g., Kirchner, 2006; Fenicia et al., 2008, 2016). However, despite encouraging progress on synthesis efforts of perceptual models used by hydrologists (McMillan et al., 2023), we currently lack a detailed understanding of spatial variability in the drivers of hydrologic behaviour (i.e., climate, topography, land cover and subsurface properties) across large domains. This prevents the use of these model development approaches for geographical domains much larger than individual research basins.

– Second, it is possible to rely on existing models and investigate how well such models perform for a wide variety of basins. This is especially attractive in the case of large geographical domains, where constructing new models for each location may be infeasible. Such approaches include model intercomparison projects (e.g., De Boer-Euser et al., 2017; Bouaziz et al., 2021; Mai et al., 2022b), investigations into model structure uncertainty (e.g., Lane et al., 2019; Knoblen et al., 2020), and attempts to automatically calibrate model structures (e.g., Mai et al., 2022a; Spieler et al., 2020; Spieler and Schütze, 2024). One common challenge such studies have faced is that it has been difficult to relate model performance to model realism, and there is thus only limited guidance that would help select models that faithfully represent hydrologic behaviour for a given basin.

In many respects, the challenges with accuracy and process fidelity in the single-model paradigm have been replaced with new challenges of model structure identification in the multi-model paradigm.



In summary, despite the need for hydrologic predictions across large geographical domains (e.g., Eagleson, 1986; Beven, 2007; Bierkens, 2015; Blair et al., 2019), there is still limited understanding of which model or models would be appropriate to use for such large-domain predictions. Differences in the performance of different models are typically expressed through differences in metrics such as the Nash-Sutcliffe Efficiency (NSE, Nash and Sutcliffe, 1970) or Kling-Gupta Efficiency (KGE, Gupta et al., 2009). This is convenient when investigating model behavior across many different locations, as would be the case in large-domain model performance assessments, but it is difficult to unambiguously select one model over another based on the aggregate NSE and KGE metrics alone. We will expand on this in the following section.

## 1.2 Equifinality during model identification

Studies that rely on aggregated performance metrics such as NSE and KGE need some way to account for equifinality (Beven, 1993; Beven and Freer, 2001; Beven, 2006; Ebel and Loague, 2006; Kelleher et al., 2017; Khatami et al., 2019): the concept that different simulations (resulting from different parameter sets for a given model or different models altogether) may obtain very similar or identical efficiency scores, as a consequence of reducing an entire time series of errors into a single number (Gupta et al., 2008).

Selecting models under equifinality may be done with Bayesian methods that estimate the likelihoods of different models or parameter sets (e.g., Vrugt et al., 2003; Kavetski et al., 2006a, b; Vrugt et al., 2008; Thyer et al., 2009; Renard et al., 2010; Schöniger et al., 2014; Höge et al., 2019). Two related alternatives to formal Bayesian approaches are ad-hoc approaches that (1) consider any model that beats a given performance score threshold as a plausible candidate (e.g., the GLUE methodology, Beven and Binley, 1992; Beven and Freer, 2001; Krueger et al., 2010), or (2) quantify the number of models that perform within a given score difference from the best model in a given case (e.g.,  $x$  models are within  $y$  KGE from the best model in a basin, Knoben et al., 2020; Spieler and Schütze, 2024). No matter if or how equifinality is accounted for, a brief overview of the literature shows that model structure equifinality tends to be high (e.g., Bell et al., 2001; Perrin et al., 2001; Clark et al., 2008; Seiller et al., 2012; Van Esse et al., 2013; De Boer-Euser et al., 2017; Lane et al., 2019; Knoben et al., 2020; Spieler et al., 2020; Bouaziz et al., 2021; Troin et al., 2022; Spieler and Schütze, 2024; Song et al., 2024). Taken together, these studies show there are distinct regional differences in model performance, and certain models may perform much worse for a given basin than other models, but it is typically possible to find multiple models that produce simulations with close-to-best performance for a given basin.

We specifically call out the results of two of these studies to provide context for the KGE scores discussed in later sections of this manuscript. First, Knoben et al. (2020) show that across a sample of 559 basins and 36 models, for the majority of these basins it is possible to find between 2 and up to 28 model structures that perform within  $\Delta 0.05$  KGE from the best model in each basin. Second, Spieler and Schütze (2024) performed an extensive model structure identification exercise using close to 7,500 automatically defined model structures, as well as 45 literature-based models. They found that for 12 climatically varied



MOPEX catchments (Duan et al., 2006), at least 378 and up to 2100 of the tested model structures can perform within  $\Delta 0.05$  KGE from the best model in each basin, though these models do so through very different internal dynamics. To summarize, findings about model structure identification based on aggregated performance metrics are mostly consistent: for most basins it is possible to obtain very similar system-scale performance with very different models. Under such conditions it is difficult to select the most realistic model out of competing alternatives with similar performance levels (Kirchner, 2006).

There have been suggestions in the literature that equifinality in model performance may be even larger than current understanding indicates. For example, Clark et al. (2008) show that for a specific basin, only 10 out of approximately 4000 time steps contribute some 70% of the total model error. Similarly, in a study of 671 basins across the Contiguous United States, Newman et al. (2015) show that in a large number of basins fewer than 20 days out of a 15-year validation period contribute 50% of the total error. This suggests a strong sensitivity of the chosen performance metric to the exact sample of days for which the metric is calculated. Recent work refers to this concept as “sampling uncertainty” in objective function values and provides methods to estimate the true value of system-scale performance metrics and quantify this uncertainty (Lamontagne et al., 2020; Clark et al., 2021). Building on the work of Lamontagne et al. (2020), Clark et al. (2021) introduce a bootstrap-jackknife-based strategy to quantify the sampling uncertainty for a given data period, and use the same sample of 671 basins (Newman et al., 2015) to show that there is strong spatial variability in the sampling uncertainty inherent in aggregated efficiency scores. They also show that as a consequence of sampling uncertainty, for the majority of these basins tolerance intervals around NSE and KGE scores are larger than 0.10 NSE or KGE “points”, far exceeding the kind of score differences that are often seen as meaningful in other studies. However, explicitly accounting for the sampling uncertainty inherent in aggregated model performance scores is not (yet) common practice, and it is unknown to what extent sampling uncertainty affects attempts at model selection across large geographical domains.

### 1.3 Problem statement

In this technical note we revisit the model comparison study of Knoben et al. (2020), who calibrate 36 different lumped conceptual models for 559 basins across the Contiguous United States. We specifically account for the sampling uncertainty in the KGE scores of these modeling results to answer the following three questions relevant within a “multi-model mosaic” paradigm:

- For a given model, in how many basins does that model’s performance score fall within the uncertainty bounds of the best model in that basin?
- For a given basin, how many models show performance scores within the uncertainty bounds of the best model in that basin?
- What is the minimum number of models needed to obtain simulations with “close-to-best” performance across the full domain?



Despite increasing attention for model structure uncertainty, and improved understanding of which models work well in different locations, selecting appropriate model structures across large geographical domains is an open challenge and actual implementations of a "multi-model mosaic" paradigm for hydrologic prediction are still rare. Our aim with this paper is to highlight a core challenge such implementations will need to overcome in order to fulfil their goal of providing locally relevant, realistic, and optimally performant simulations.

## 2 Data and Methods

### 2.1 Streamflow observations and simulations

We obtained streamflow observations, gauge locations and basin areas from the CAMELS data set (Newman et al., 2015; Addor et al., 2017a), and the model simulations for these basins described in Knoben et al. (2020). Briefly, Knoben et al. (2020) first select 559 out of the 671 basins provided in the CAMELS data set based on water balance closure considerations and estimated basin area errors. Next, the data for the remaining 559 basins are divided into two 10-year periods for model calibration and validation respectively. Thirty-six models taken from the Modular Rainfall Runoff Modelling Toolbox (MARRMoT, Knoben et al., 2019b) are then calibrated using the Kling-Gupta Efficiency (KGE) as the objective function and streamflow as the variable of interest. The 36 models are all based on earlier publications and cover a wide range of configurations, varying from a simple 1 store (i.e., state variable), 1 parameter bucket model to relatively complex configurations with up to 6 stores and 15 parameters. Eight out of these models include a snow module, while the remaining 28 models have no real capability to deal with snow accumulation and melt. We refer the reader to Knoben et al. (2019b) and Knoben et al. (2020) for further details about the toolbox and the specific model ensemble used here.

### 2.2 Methodology

Our analysis consists of four concrete steps:

1. The data package provided by Knoben et al. (2020) does not include streamflow observations, and we therefore need to obtain these from the CAMELS data set (Newman et al., 2014; Addor et al., 2017b). We converted these observations from  $\text{ft}^3 \cdot \text{s}^{-1}$  into  $\text{mm} \cdot \text{day}^{-1}$  using the GAGES II areas provided as part of the CAMELS data to match the simulations.
2. Using the observations and model simulations, we can calculate the KGE scores and quantify their associated uncertainty with the `gumboot` package (Clark and Shook, 2021; Clark et al., 2021). Briefly, `gumboot` returns various statistics, such as the 5<sup>th</sup>, 50<sup>th</sup> and 95<sup>th</sup> percentile estimates of the KGE score. For simplicity, we only calculate the KGE uncertainty bounds for the model with the highest validation KGE score in each basin, and use these bounds to inform



165 our analysis. We can use `gumboot` in 555 out of 559 basins. The remaining four basins contain years with no observed  
flow, and this interferes with the computation of standard deviations and correlations during `gumboot`'s bootstrapping  
procedure. These four basins are excluded from further analysis. For the remainder of basins, we exclude all models with  
efficiency scores below the 5<sup>th</sup> percentile estimate of the the KGE score of the best model in a given basin from further  
analysis, and thus only keep those models with efficiency scores that fall within the uncertainty bounds of the best model  
170 in each basin.

3. The sampling uncertainty obtained from `gumboot` provides enough information to answer the first two research ques-  
tions. To answer the third research question, we implement a model selection algorithm based on linear programming  
because this is considerably faster than using a brute-force approach. The algorithm selects the optimal (minimum) num-  
ber of models needed to obtain performance scores that fall within the uncertainty bounds of the best model available  
175 for each basin.

4. To investigate the impact of the choice of objective function on these findings, we repeat steps (2) and (3) using the  
low-flow calibration results of Knoben et al. (2020). These rely on the same models and basins, but use the reciprocal of  
flows to calculate model performance as  $KGE(1/Q)$ . To avoid issues with zero flows, a constant  $\epsilon$  equal to 1% of mean  
observed flows is added on every time step to the observed and simulated flows (Pushpalatha et al., 2012; Knoben et al.,  
180 2020).

Figure 1 illustrates the sampling uncertainty and model filtering described in step 2, using the basin with the lowest (Fig.  
1a,b) and highest (Fig. 1c,d) sampling uncertainty respectively. Figure 1a shows the observations and simulations in a basin  
with a strongly seasonal and relatively regular flow regime. KGE scores in this basin (Fig. 1b) are comparatively high, but the  
sampling uncertainty is low due to the regularity of the flow regime: the choice of data on which the best model is evaluated  
185 does not substantially change the KGE scores obtained for this model. Consequently, only a handful of models fall within the  
uncertainty bounds of the best model (grey horizontal lines), despite the overall rather high KGE scores obtained by all models  
(note the values on the y-axis). In contrast, Figure 1c shows observations and simulations in a basin dominated by irregular  
high flow events. Despite the lower KGE scores obtained by all models (Fig. 1d; note different y-axis compared to Fig. 1b), the  
sampling uncertainty around the score of the best model is so large that all models are within the uncertainty bounds of the best  
190 model for this basin. This basin is a prime example of a location where individual events/time steps have a disproportionate  
effect on the overall KGE score, and the exact data sample chosen to validate the models on thus has a large impact on which  
scores are obtained.

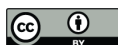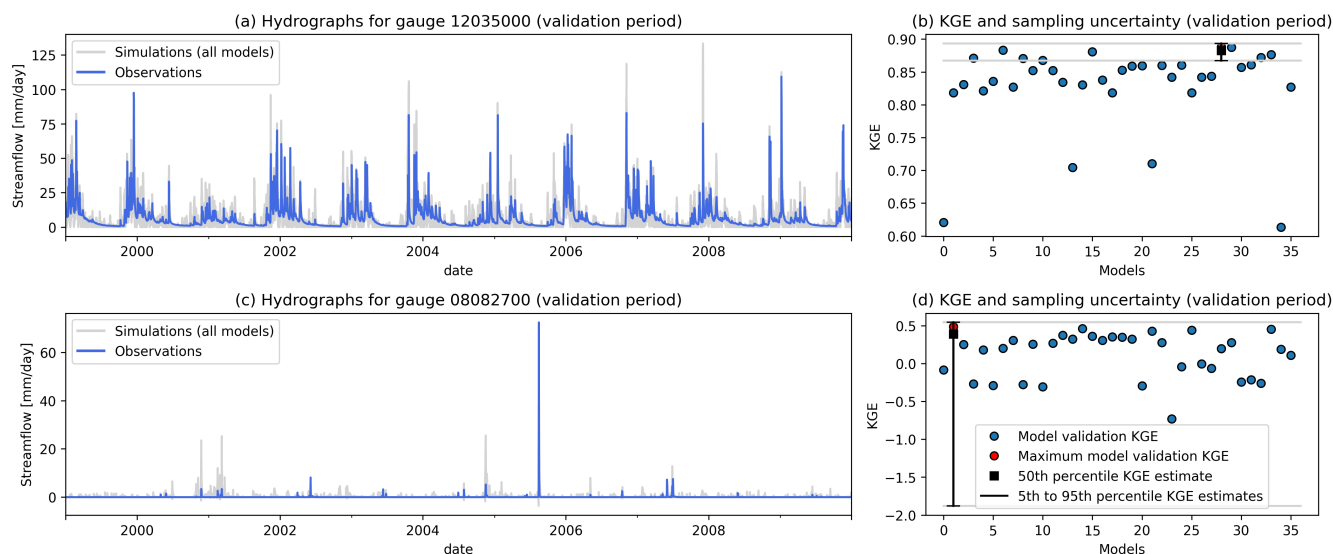

**Figure 1.** Example basins to illustrate the methodology. (a) Observations and simulations for the gauge with the lowest KGE sampling uncertainty within the 555 tested basins. (b) Model scores during validation, as well as sampling uncertainty ranges for the best model in basin 12035000. (c) Observations and simulations for the gauge with the highest KGE sampling uncertainty within the 555 tested basins. (d) Model scores during validation, as well as sampling uncertainty ranges for the best model in basin 08082700.

### 3 Results

#### 3.1 Objective function values and sampling uncertainty

195 Figure 2 shows (a,d) the maximum KGE score found for each basin, (c,d) the uncertainty associated with these scores (here expressed as the difference between the 95<sup>th</sup> and 5<sup>th</sup> percentile estimate of the KGE score estimated by `gumbboot`), (b) as well as from which model the maximum KGE in each basin is obtained. These results are in line with earlier reports on regional differences in model performance (see e.g., Newman et al., 2015; Knoben et al., 2020), uncertainty in model performance scores (see e.g., Newman et al., 2015; Clark et al., 2021), and the considerable scatter in which model would be chosen based on maximum performance alone (see e.g., Perrin et al., 2001; Knoben et al., 2020). We included these results here to provide context for the remainder of this section.

#### 3.2 Equifinality as a consequence of objective function sampling uncertainty

Figure 3a shows the number of basins in which each model achieves a performance score that falls within the uncertainty bounds of the best model for each respective basin. As a convenient shorthand, we will refer to models with performance scores within



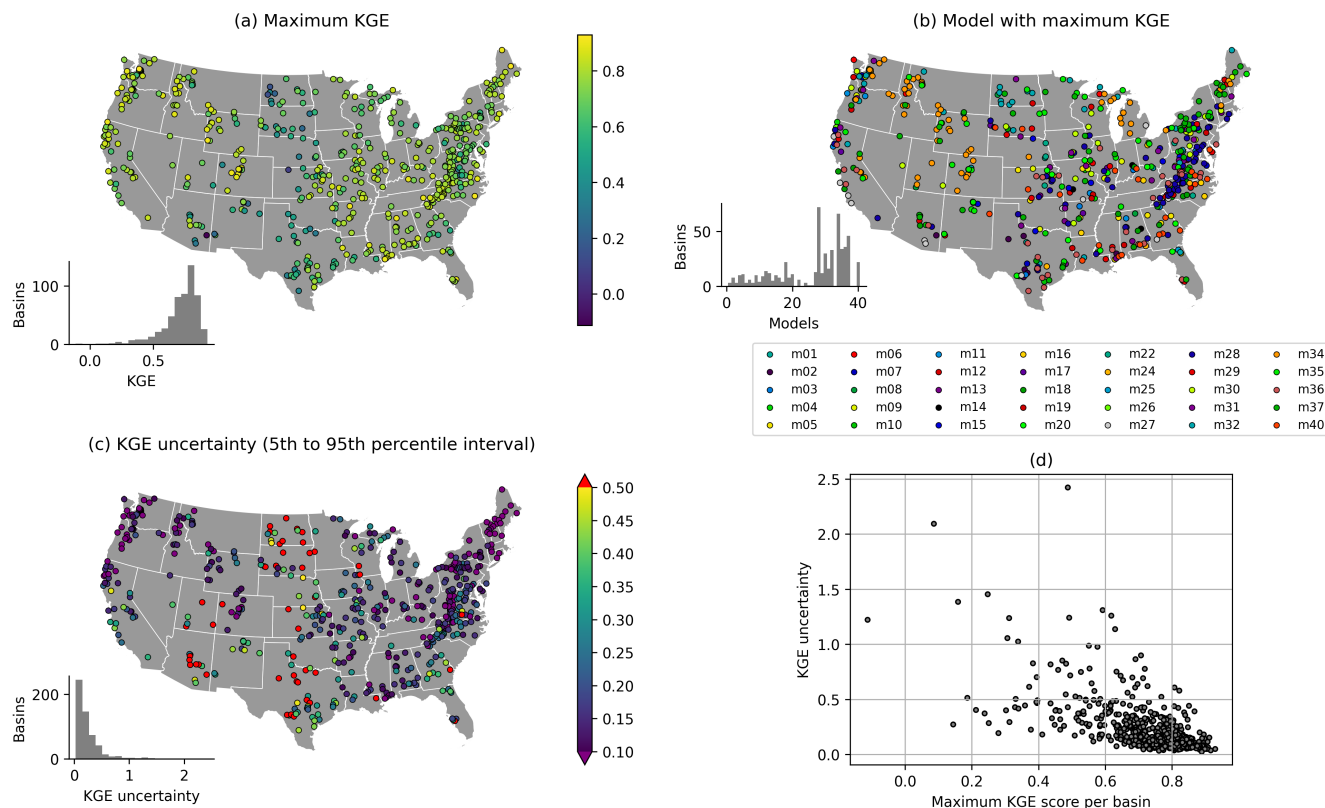

**Figure 2.** Model results for 555 CAMELS basins. (a) maximum KGE score obtained per basin for the evaluation period. (b) Model that obtains the maximum evaluation KGE score shown in (a). (c) Sampling uncertainty in KGE scores obtained from `gumbboot`, with the color axis capped at either end for clarity. (d) Scatter plot showing the relation between maximum KGE and its associated uncertainty. Borders here, and in later Figures, from Commission for Environmental Cooperation (CEC) (2022).

205 the uncertainty bounds around the highest model score obtained in a given catchment as "performance-equivalent [under the  
 current experimental design]". The MARRMoT toolbox contains a wide range of different model structures, and even the  
 worst of these is performance-equivalent to the the best model in at least 50 basins (i.e., slightly below 10% of cases, while  
 this model, *m01*, already was the top-performing model in only in a handful of these basins - see the histogram inset in Fig.  
 2b). The model that is performance-equivalent to the best model in the most basins is one of medium complexity (*m28*, 4 state  
 210 variables, 12 parameters), and performs within the uncertainty bounds of the best model in 362 basins (i.e., almost two-thirds  
 of cases; the model was already the top-performing model in slightly over 70 of these basins - see Fig. 2b). Critically, this  
 model does not include a snow routine. The calibration procedure will have tried to compensate for this lack through parameter  
 optimization, but it is unlikely for this model to perform well in any basin that experiences a substantial amount of snowfall.

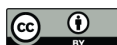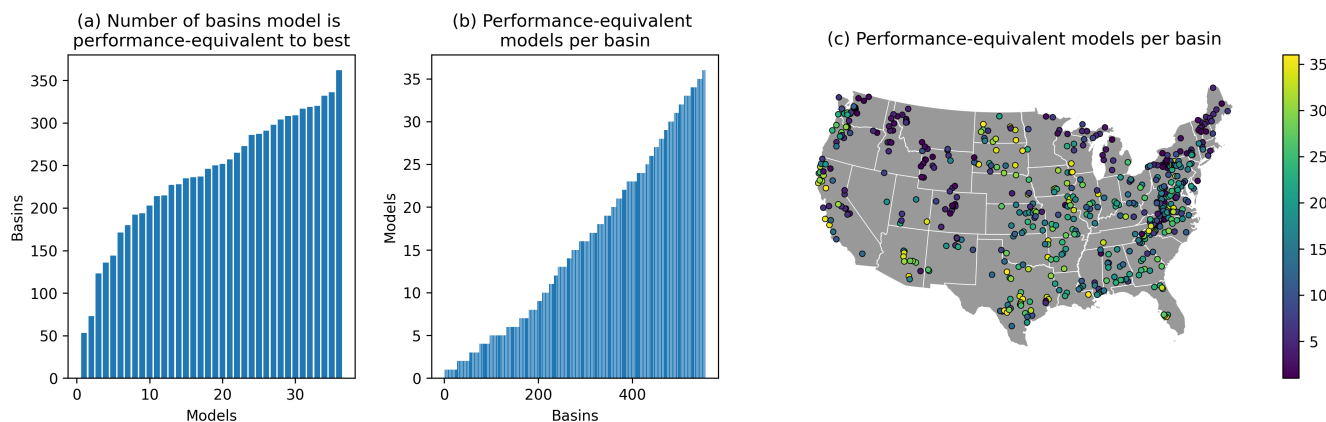

**Figure 3.** (a) Number of times each model falls within the uncertainty bounds around the performance of the best model in each basin. Note that a model can fall within its own uncertainty bounds. Models are ordered by number of basins, not by their MARRMoT IDs. (b) Number of models that fall within the uncertainty bounds around the best model's performance for each basin. (c) Spatial overview of [b].

Figure 3b shows that the number of performance-equivalent models varies strongly between basins, and Figure 3c shows this information across space. There are a handful of basins where the number of performance-equivalent models is modest, but for most basins it is possible to find numerous models that are within the uncertainty bounds of the best model. In fact, in 7 basins (approximately 1.5% of all cases) every single model in the ensemble obtains validation KGE scores that are within the uncertainty bounds of the best model. Figure 3c shows only one obvious regional signal, which is an artifact of the experimental design. Only eight of the tested model structures include a snow routine, and regions that experience more snowfall (i.e. the Rocky, Cascade, and Sierra Nevada mountain ranges, as well as the Northeast and the Great Lakes regions, Addor et al. (2017a)) thus have lower numbers of performance-equivalent models. Across the remainder of the domain where snow plays a smaller role, no clear patterns in the number of performance-equivalent models exists.

### 3.3 Model selection under objective function sampling uncertainty

Figure 4 shows the outcome of our model selection procedure, where we try to minimize the number of models needed to obtain performance-equivalent simulations in all basins. As shown in Figure 4a, a single model (*m28* in MARRMoT identifiers) is performance-equivalent to the best model in almost two-third of the basins and only 4 models (*m28*, *m34*, *m37*, *m36*) are needed to get performance-equivalence in more than 95% of basins. An initial exploration of mapping model structures onto hydroclimates suggests that this first model (4 state variables, 12 parameters) achieves performance-equivalence in a wide variety of hydroclimates, which may be due to its flexible treatment of variable contributing areas. The next two models (*m34*, 5 state variables and 12 parameters, and *m37*, 5 state variables and 15 parameters) perform well in snow-dominated basins, due to their snow accumulation and melt routines. The first of these has a basic degree-day snow model coupled to a model structure

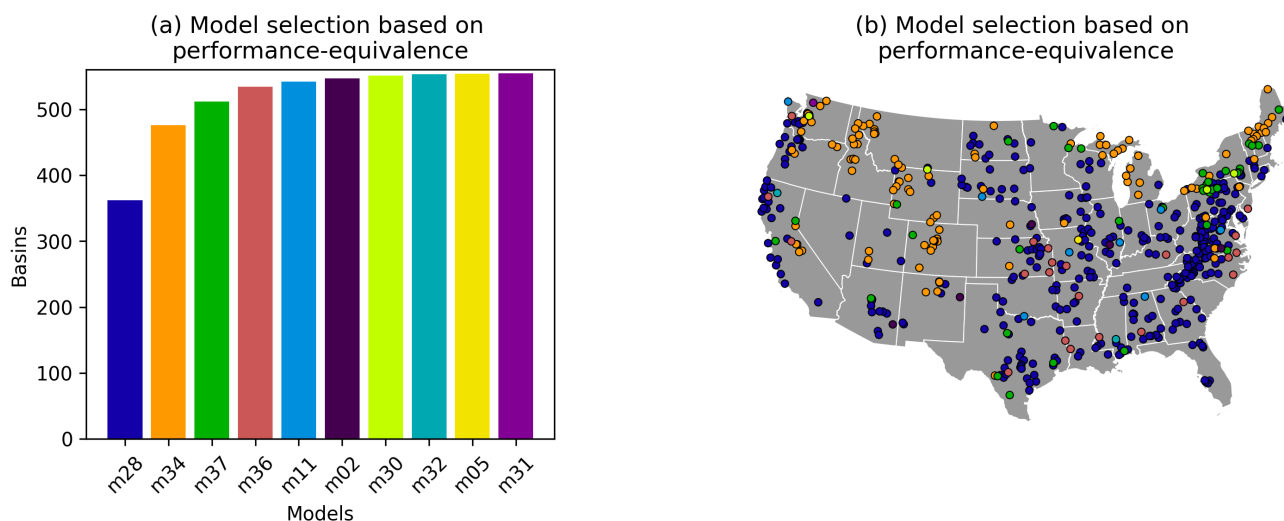

**Figure 4.** Outcome of model selection for large-domain modeling. (a) Number of basins covered by an increasing number of models. *mx* refers to the model identifier. (b) Spatial distribution of basins covered by each model (colors refer to specific models as shown in (a)).

that incorporates two parallel unit hydrographs. This may give the model a certain capability to simulate heterogeneity in basin runoff as a consequence of spatial differences in snowmelt timing. The second contains a more complex snow accumulation and melt routine that has the capability to refreeze meltwater, which may provide some capability to deal with the consequences of intermittent melt events during winter. The distinguishing feature of the fourth model (*m36*; 5 state variables, 15 parameters) is its ability to represent losing streams, though it is difficult to determine to what extent this plays a role here. Another six models are needed to fill the remaining 21 basins, at 8, 5, 4, 2, 1 and 1 basin(s) respectively. We consider these numbers small enough to be noise, likely caused by data and parameter uncertainty.

### 3.4 Objective function impact

Figure 5 repeats the earlier analysis with model simulations obtained when calibrating the models to a KGE(1/Q) target. This is intended to emphasize low flows and leads to considerable differences compared to the findings based on KGE(Q), though the context of the problem remains the same: there are certain spatial differences in the maximum KGE scores obtained (Fig. 5a) and model selection based on these maximum KGE scores would lead to a patchwork of different models being used (Fig. 5b). Figure 5c shows that generally the models are performance-equivalent to the best model in fewer basins. In fact, the worst model is only performance-equivalent to the best model in a single basin (compared to 53 before), and the best model is performance-equivalent to the best model in 263 basins compared to 362 before. This is reflected in the number of performance-equivalent models in each basin (Figure 5d, e), which shows a very different distribution for this objective function than before (compare with Figure 3b, c). Consequently, almost double the number of models are needed to obtain



close-to-best performance throughout the entire domain (Figure 5f, g), with 8 models being needed to obtain 95% coverage.  
250 Critically, these models only partially overlap with the models identified in Figure 4. The findings presented in this paper are  
thus conditional on the chosen objective function, but, compared to the “almost every model is the best *somewhere*” model  
selection case visible in Figure 5b, the general message holds: if one accounts for the sampling uncertainty in KGE scores,  
fewer models are needed to obtain performance-equivalent simulations than one might expect.

#### 4 Discussion

255 The concept of equifinality has been discussed in the literature for a considerable time (Beven, 1993), and, given the existing  
literature on model structure uncertainty (e.g., Bell et al., 2001; Perrin et al., 2001; Clark et al., 2008; Krueger et al., 2010;  
Seiller et al., 2012; Van Esse et al., 2013; De Boer-Euser et al., 2017; Lane et al., 2019; Knoben et al., 2020; Spieler et al.,  
2020; Bouaziz et al., 2021; Troin et al., 2022; Spieler and Schütze, 2024), the results presented in this paper are not surprising.  
However, detailed understanding of the sampling uncertainty in performance metrics is a relatively recent development (e.g.,  
260 Lamontagne et al., 2020; Clark et al., 2021), and accounting for sampling uncertainty in model comparison studies or during  
model selection is not yet common. We show in this paper that accounting for sampling uncertainty makes it very difficult  
to distinguish among competing models. It is possible to use performance scores to weed out extremely poor models, but the  
sampling uncertainty in these scores makes it difficult to meaningfully select appropriate model structures beyond the trivial  
(e.g., that a snow module is needed in basins with snowfall, or that including some form of soil evaporation is helpful - see also  
265 Figure 6 in Spieler and Schütze (2024) and the accompanying discussion therein).

This has various implications for large-domain model selection. Whereas “uniqueness of place” (Beven, 2000) suggests that  
different models will be applicable for different landscapes, there is so far only limited (mostly local, i.e., from single or small  
numbers of catchments) evidence that “uniqueness of models” leads to appreciable increases in model performance. Local  
studies in research basins typically have the benefit of more complete data availability, longer records, and extensive experience  
270 of the modeller with the basin in question (e.g., Fenicia et al., 2016), and this allows model evaluation and improvement until  
a model produces “the right results for the right reasons” (Kirchner, 2006). Across large geographical domains, aggregated  
objective scores currently remain the leading method for model selection and improvement, and our results suggest that in  
such methodologies a (very) small number of models will be sufficient to achieve close-to-best performance for most basins.  
In fact, given the high predictive power of machine learning approaches such as Long Short-Term Memory networks (LSTMs,  
275 Kratzert et al., 2019; Klotz et al., 2022) and hybrid models (e.g., Shen et al., 2023; Song et al., 2024), it is distinctly possible,  
though yet unproven, that just a single model structure will be sufficient to achieve performance-equivalence across such large  
domains. As evidenced by the different results we obtained for different objective functions however, this comes with the  
caveat that such a model may not necessarily be appropriate for different purposes, and it may be that generalizing across  
geographical space is easier than finding a model that works well in different regions in objective function space.

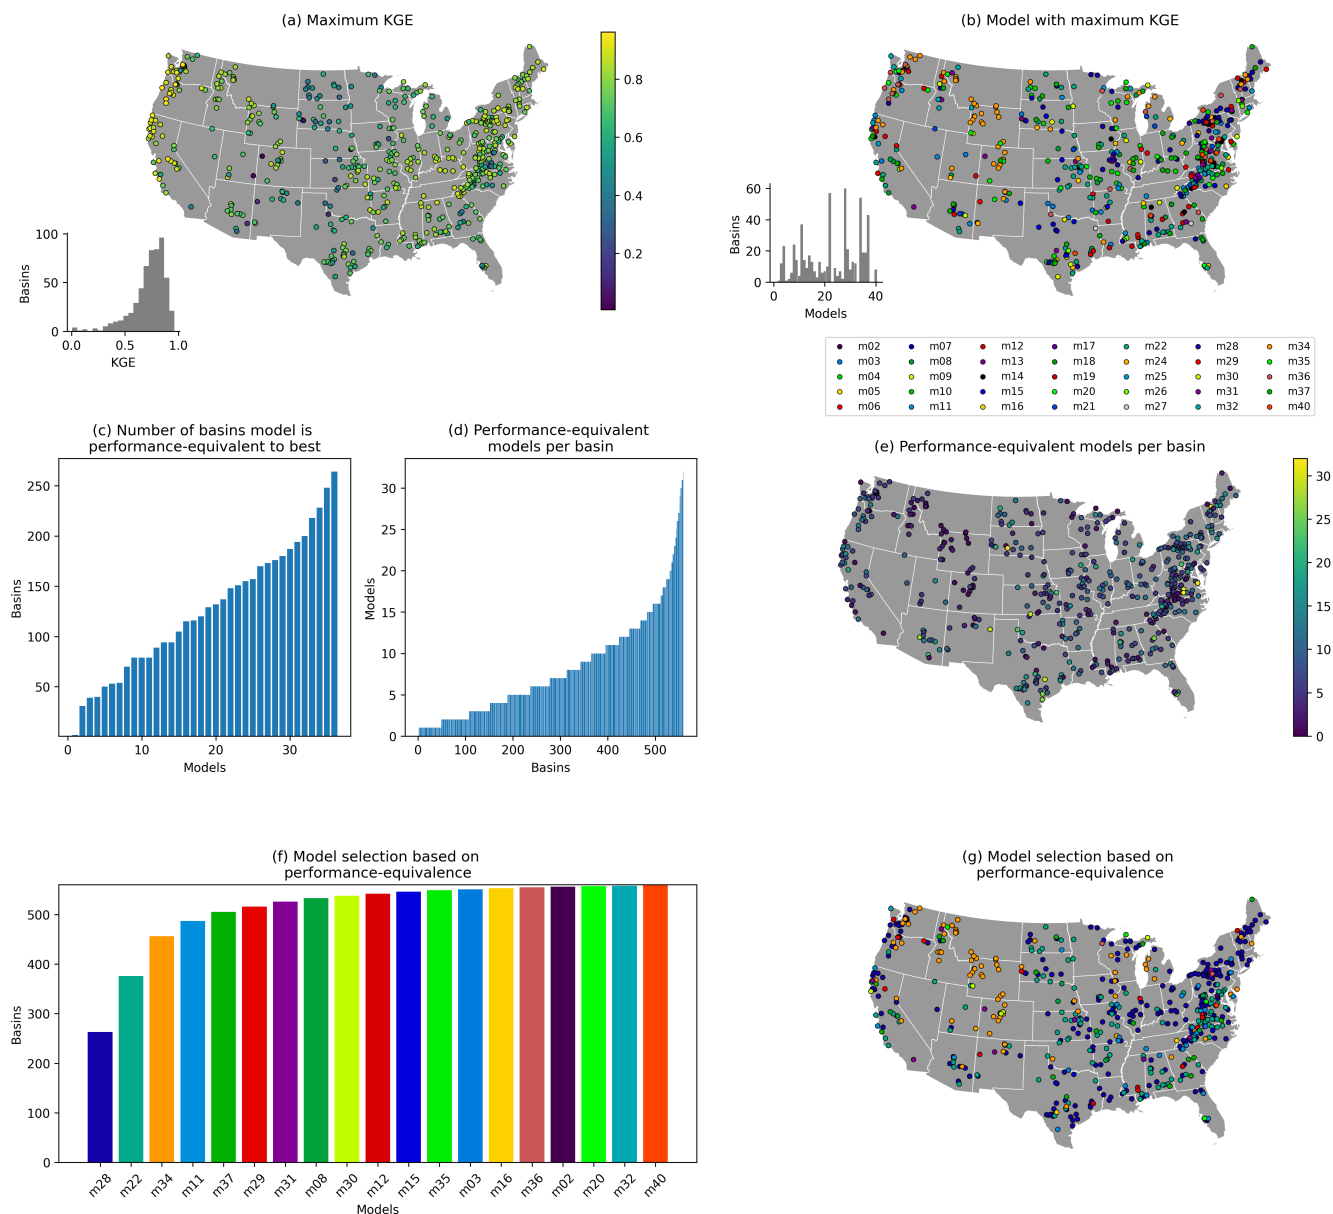

**Figure 5.** Repeat of earlier analysis for models calibrated with a KGE(1/Q) objective function. (a) Maximum KGE score per basin. (b) Model from which the maximum KGE score in each basin is obtained. (c) Number of times each model falls within the uncertainty bounds around the performance of the best model in each basin. Note that a model can fall within its own uncertainty bounds. (d) Number of models that fall within the uncertainty bounds around the best model’s performance for each basin. (e) Spatial overview of [d]. (f) Number of basins covered by an increasing number of models. *m<sub>xx</sub>* refers to the model identifier. (g) Spatial distribution of basins covered by each model (colors refer to specific models as shown in (f)).



280 Regardless, the concerns outlined by Kirchner (2006) still apply: high efficiency scores do not guarantee internally realistic  
models, and this may be of concern when those internal variables are needed for prediction of environmental hazards such  
as floods, droughts and wildfires. Possible paths forward for selecting models based on realism will likely need to at least  
partially mimic the approaches already applied at smaller scales. First, perceptual models of hydrologic behaviour that span  
large geographical domains are needed. Next, this understanding of hydrologic behaviour needs to be mapped onto models,  
285 modules, or specific equations that represent some (combination of) hydrologic process(es) correctly (for example, through  
hypothesis testing, Clark et al., 2011). Finally, diagnostic model evaluation approaches that go beyond aggregated error metrics  
are needed to quantify each models strengths and weaknesses (Gupta et al., 2008; Euser et al., 2013). Many of the elements  
required to apply these approaches to large geographical domains already exist, but synthesis efforts to bring these elements  
together are still rare. Concentrated community efforts will be needed to make progress on this topic.

## 290 5 Limitations and future work

### 5.1 Objective function distributions

We use a fairly simplistic approach to account for the sampling uncertainty in objective functions in this work, by only ac-  
counting for the sampling uncertainty of a single model in each basin. This has two theoretical limitations. First, we select  
the single model in each basin using the KGE scores obtained for the full validation period, without accounting for sampling  
295 uncertainty in this first selection. Preliminary analysis (not shown for brevity) suggests that these full-period scores correlate  
with the estimated 50<sup>th</sup> percentile scores obtained with *gumbboot*, but some scatter is present. Second, we do not account for the  
KGE sampling uncertainty for other models in each basin and simply rely on the KGE scores obtained for the full validation  
period to determine whether or not that model is considered within the sampling uncertainty of the best model in each basin.  
Practically speaking, one can envision a scenario where model X by chance barely falls within the uncertainty bounds of the  
300 best model Y, but that model X's own uncertainty interval mostly falls outside that of Y. In such a case it may not be the most  
sensible to treat model X and Y as performance-equivalent. Future work could account for the objective function sampling  
uncertainty in all models, and use the fractional overlap of objective function distributions for analysis. Doing so would ad-  
dress both limitations at the same time. This would also open up the opportunity to investigate different definitions of the "best  
model for each basin", such as selecting the best model as a compromise between its estimated 50<sup>th</sup> percentile KGE estimate  
305 and the size of the associated uncertainty interval.



## 5.2 Model selection

The models used in this work were a convenient choice, but represent a subset of the wider range of hydrologic models available. Extending the sample by including different models of varying complexity (e.g., physics-based models and machine-learning models) could provide valuable insights. Similarly, our sample of conceptual models is somewhat limited by the fact that only eight of these models have a dedicated snow component. The relative success of one of these “no-snow” models in representing hydrologic behaviour in a wide variety of basins (see Figure 4a) strongly suggests that further investigations using conceptual models connected to snow routines will be worthwhile.

## 5.3 Modeling purpose

In this paper we investigated the number of models needed to reach full domain coverage for two different objective functions, under the assumption that these different objective functions are representative of different modelling goals. However, there are different ways to investigate the number of models needed for specific purposes. For example, follow-up work could investigate the stability of our conclusions for simulation of different flow percentiles, such as the lower 10<sup>th</sup> percentile for simulation of low flows and droughts, or the upper 90<sup>th</sup> percentile for simulation of floods.

## 6 Conclusions

We investigated the number of conceptual models needed to obtain accurate simulations for 559 basins across the Contiguous United States. The novelty of this work is that we explicitly account for the sampling uncertainty in the Kling Gupta Efficiency (KGE) scores that we use to quantify the accuracy of each model’s simulations. This sampling uncertainty refers to the fact that in certain basins individual time steps used to calculate scores such as KGE can have a disproportionate impact on the overall score. Consequently, the choice of calibration and validation periods can strongly impact the KGE scores obtained, and the same simulations may be valued very differently depending on how the calibration/validation data is chosen.

Accounting for this sampling uncertainty reveals that it is often very difficult to distinguish among competing models. If we were to select models based on their validation KGE scores only, almost all of the investigated 36 models would be selected for at least a handful of basins. When we account for the sampling uncertainty in the KGE scores, the number of required models drops drastically. Only four models are needed to get simulations with acceptable accuracy in 95% of basins. 100% coverage is obtained with ten models, without accounting for further complicating factors such as data and parameter uncertainty. These findings hold for a different objective function aimed at low flow simulation: the KGE of the reciprocal of flows. Compared to almost all models being selected based on validation KGE(1/Q) scores, only eight models are needed to cover 95% of basins and 19 models for 100% coverage.



The results presented in this paper have consequences for model selection across large geographical domains. Whereas "unique-  
335 ness of place" suggests that different models will be applicable to different landscapes, the results of this analysis suggest that  
"uniqueness of models" does not necessarily lead to appreciable increases in model performance. Further work will need to  
show whether this is a general rule, or if with more thoughtful model evaluation procedures the connection between models and  
places can be made more explicit. In the meantime, model selection procedures based on scores such as KGE will suggest that  
a small handful of models is adequate to simulate streamflow if the sampling uncertainty in such scores is explicitly accounted  
340 for.

*Code and data availability.* Streamflow observations, gauge locations and basin areas were obtained from the CAMELS data set (Newman  
et al., 2014; Addor et al., 2017b). Model results described in Knoben et al. (2020) were obtained from the University of Bristol data repository  
(Knoben et al., 2019a). The `gumbboot` library (Clark and Shook, 2021) that implements the methods described in Clark et al. (2021) was  
obtained through the Comprehensive R Archive Network (CRAN). Analyses were performed in both R and Python; code to reproduce these  
345 results is available through Zenodo (Knoben, 2024).

*Author contributions.* MC wrote the project proposal this work falls under with contributions from AP, AW, CS, MK and KvW. The idea  
for this project was developed in discussions between MC, WK, MK, CS, YS, KvW and AW. WK created the analysis code and the draft of  
this paper. AR contributed the linear programming model selection code and performed preliminary analysis related to the models' ability to  
simulate specific parts of the hydrograph. MK provided supervision of AR. The paper draft was finalized based on contributions from AR,  
350 GG, MK, AP, YS, CT, KvW and MC.

*Competing interests.* The authors declare the have no competing interests.

*Acknowledgements.* We would like to thank Diana Spieler for her comments that helped improve the text. This project received funding under  
award NA22NWS4320003 from the NOAA Cooperative Institute Program. The statements, findings, conclusions, and recommendations are  
those of the author(s) and do not necessarily reflect the views of NOAA.





## 355 References

- Addor, N. and Melsen, L. A.: Legacy, Rather Than Adequacy, Drives the Selection of Hydrological Models, *Water Resources Research*, 55, 378–390, <https://doi.org/10.1029/2018WR022958>, 2019.
- Addor, N., Newman, A. J., Mizukami, N., and Clark, M. P.: The CAMELS data set: catchment attributes and meteorology for large-sample studies, *Hydrology and Earth System Sciences*, 21, 5293–5313, <https://doi.org/10.5194/hess-21-5293-2017>, 2017a.
- 360 Addor, N., Newman, A. J., Mizukami, N., and Clark, M. P.: Catchment attributes for large-sample studies, <https://doi.org/10.5065/D6G73C3Q>, 2017b.
- Arheimer, B., Pimentel, R., Isberg, K., Crochemore, L., Andersson, J. C. M., Hasan, A., and Pineda, L.: Global catchment modelling using World-Wide HYPE (WWH), open data, and stepwise parameter estimation, *Hydrology and Earth System Sciences*, 24, 535–559, <https://doi.org/10.5194/hess-24-535-2020>, 2020.
- 365 Bell, V., Carrington, D., and Moore, R.: Comparison of rainfall-runoff models for flood forecasting - part 2, Tech. rep., Environment Agency, publication Title: R&D Technical review W241, 2001.
- Beven, K.: Prophecy, reality and uncertainty in distributed hydrological modelling, *Advances in Water Resources*, 16, 41–51, [https://doi.org/10.1016/0309-1708\(93\)90028-E](https://doi.org/10.1016/0309-1708(93)90028-E), 1993.
- Beven, K.: A manifesto for the equifinality thesis, *Journal of Hydrology*, 320, 18–36, <https://doi.org/10.1016/j.jhydrol.2005.07.007>, 2006.
- 370 Beven, K.: Towards integrated environmental models of everywhere: uncertainty, data and modelling as a learning process, *Hydrology and Earth System Sciences*, 11, 460–467, <https://doi.org/10.5194/hess-11-460-2007>, 2007.
- Beven, K. and Binley, A.: The future of distributed models: Model calibration and uncertainty prediction, *Hydrological Processes*, 6, 279–298, <https://doi.org/10.1002/hyp.3360060305>, 1992.
- Beven, K. and Freer, J.: Equifinality, data assimilation, and uncertainty estimation in mechanistic modelling of complex environmental systems using the GLUE methodology, *Journal of Hydrology*, 249, 11–29, [https://doi.org/https://doi.org/10.1016/S0022-1694\(01\)00421-8](https://doi.org/https://doi.org/10.1016/S0022-1694(01)00421-8), 2001.
- 375 Beven, K. J.: Uniqueness of place and process representations in hydrological modelling, *Hydrology and Earth System Sciences*, 4, 203–213, <https://doi.org/10.5194/hess-4-203-2000>, 2000.
- Bierkens, M. F. P.: Global hydrology 2015: State, trends, and directions, *Water Resources Research*, 51, 4923–4947, <https://doi.org/10.1002/2015WR017173>, 2015.
- 380 Bierkens, M. F. P., Bell, V. A., Burek, P., Chaney, N., Condon, L. E., David, C. H., De Roo, A., Döll, P., Drost, N., Famiglietti, J. S., Flörke, M., Gochis, D. J., Houser, P., Hut, R., Keune, J., Kollet, S., Maxwell, R. M., Reager, J. T., Samaniego, L., Sudicky, E., Sutanudjaja, E. H., Van De Giesen, N., Winsemius, H., and Wood, E. F.: Hyper-resolution global hydrological modelling: what is next?: “Everywhere and locally relevant”, *Hydrological Processes*, 29, 310–320, <https://doi.org/10.1002/hyp.10391>, 2015.
- 385 Blair, G. S., Beven, K., Lamb, R., Bassett, R., Cauwenberghs, K., Hankin, B., Dean, G., Hunter, N., Edwards, L., Nundloll, V., Samreen, F., Simm, W., and Towe, R.: Models of everywhere revisited: A technological perspective, *Environmental Modelling & Software*, 122, 104 521, <https://doi.org/10.1016/j.envsoft.2019.104521>, 2019.
- Bouaziz, L. J. E., Fencia, F., Thirel, G., De Boer-Euser, T., Buitink, J., Brauer, C. C., De Niel, J., Dewals, B. J., Drogue, G., Grelier, B., Melsen, L. A., Moustakas, S., Nossent, J., Pereira, F., Sprokkereef, E., Stam, J., Weerts, A. H., Willems, P., Savenije, H. H. G., and Hrachowitz, M.: Behind the scenes of streamflow model performance, *Hydrology and Earth System Sciences*, 25, 1069–1095, <https://doi.org/10.5194/hess-25-1069-2021>, 2021.
- 390



- Clark, M. and Shook, K.: gumboot: Bootstrap Analyses of Sampling Uncertainty in Goodness-of-Fit statistics, <https://github.com/CH-Earth/gumboot>, r package version 1.0.1, 2021.
- Clark, M. P., Slater, A. G., Rupp, D. E., Woods, R. A., Vrugt, J. A., Gupta, H. V., Wagener, T., and Hay, L. E.: Framework for Understanding Structural Errors (FUSE): A modular framework to diagnose differences between hydrological models: DIFFERENCES BETWEEN HYDROLOGICAL MODELS, *Water Resources Research*, 44, <https://doi.org/10.1029/2007WR006735>, 2008.
- Clark, M. P., Kavetski, D., and Fenicia, F.: Pursuing the method of multiple working hypotheses for hydrological modeling, *Water Resources Research*, 47, 2010WR009827, <https://doi.org/10.1029/2010WR009827>, 2011.
- Clark, M. P., Schaefli, B., Schymanski, S. J., Samaniego, L., Luce, C. H., Jackson, B. M., Freer, J. E., Arnold, J. R., Moore, R. D., Istanbuloglu, E., et al.: Improving the theoretical underpinnings of process-based hydrologic models, *Water Resources Research*, 52, 2350–2365, 2016.
- Clark, M. P., Bierkens, M. F., Samaniego, L., Woods, R. A., Uijlenhoet, R., Bennett, K. E., Pauwels, V., Cai, X., Wood, A. W., and Peters-Lidard, C. D.: The evolution of process-based hydrologic models: historical challenges and the collective quest for physical realism, *Hydrology and Earth System Sciences*, 21, 3427–3440, 2017.
- Clark, M. P., Vogel, R. M., Lamontagne, J. R., Mizukami, N., Knoben, W. J. M., Tang, G., Gharari, S., Freer, J. E., Whitfield, P. H., Shook, K. R., and Papalexiou, S. M.: The Abuse of Popular Performance Metrics in Hydrologic Modeling, *Water Resources Research*, 57, e2020WR029001, <https://doi.org/10.1029/2020WR029001>, 2021.
- Commission for Environmental Cooperation (CEC): North American Atlas – Political Boundaries, <http://www.cec.org/north-american-environmental-atlas/political-boundaries-2021/>, statistics Canada, United States Census Bureau, Instituto Nacional de Estadística y Geografía (INEGI), 2022.
- De Boer-Euser, T., Bouaziz, L., De Niel, J., Brauer, C., Dewals, B., Drogue, G., Fenicia, F., Grelier, B., Nossent, J., Pereira, F., Savenije, H., Thirel, G., and Willems, P.: Looking beyond general metrics for model comparison – lessons from an international model intercomparison study, *Hydrology and Earth System Sciences*, 21, 423–440, <https://doi.org/10.5194/hess-21-423-2017>, 2017.
- Duan, Q., Schaake, J., Andréassian, V., Franks, S., Goteti, G., Gupta, H., Gusev, Y., Habets, F., Hall, A., Hay, L., Hogue, T., Huang, M., Leavesley, G., Liang, X., Nasonova, O., Noilhan, J., Oudin, L., Sorooshian, S., Wagener, T., and Wood, E.: Model Parameter Estimation Experiment (MOPEX): An overview of science strategy and major results from the second and third workshops, *Journal of Hydrology*, 320, 3–17, <https://doi.org/10.1016/j.jhydrol.2005.07.031>, 2006.
- Eagleson, P. S.: The emergence of global-scale hydrology, *Water Resources Research*, 22, <https://doi.org/10.1029/WR022i09Sp0006S>, 1986.
- Ebel, B. A. and Loague, K.: Physics-based hydrologic-response simulation: Seeing through the fog of equifinality, *Hydrological Processes*, 20, 2887–2900, <https://doi.org/10.1002/hyp.6388>, 2006.
- Euser, T., Winsemius, H. C., Hrachowitz, M., Fenicia, F., Uhlenbrook, S., Savenije, H. H. G., Education, W., Box, P. O., and Delft, D. A.: A framework to assess the realism of model structures using hydrological signatures, *Hydrology and Earth System Sciences*, 17, 1893–1912, <https://doi.org/10.5194/hess-17-1893-2013>, 2013.
- Fenicia, F., Savenije, H. H. G., Matgen, P., and Pfister, L.: Understanding catchment behavior through stepwise model concept improvement, *Water Resources Research*, 44, <https://doi.org/10.1029/2006WR005563>, 2008.
- Fenicia, F., Kavetski, D., Savenije, H. H. G., and Pfister, L.: From spatially variable streamflow to distributed hydrological models: Analysis of key modeling decisions, *Water Resources Research*, 52, 954–989, <https://doi.org/10.1002/2015WR017398>, 2016.
- Freeze, R. and Harlan, R.: Blueprint for a physically-based, digitally-simulated hydrologic response model, *Journal of Hydrology*, 9, 237–258, [https://doi.org/10.1016/0022-1694\(69\)90020-1](https://doi.org/10.1016/0022-1694(69)90020-1), 1969.



- 430 Gupta, H. V., Wagener, T., and Liu, Y.: Reconciling theory with observations: elements of a diagnostic approach to model evaluation, *Hydrological Processes*, 22, 3802–3813, <https://doi.org/10.1002/hyp.6989>, 2008.
- Gupta, H. V., Kling, H., Yilmaz, K. K., and Martinez, G. F.: Decomposition of the mean squared error and NSE performance criteria: Implications for improving hydrological modelling, *Journal of Hydrology*, 377, 80–91, <https://doi.org/10.1016/j.jhydrol.2009.08.003>, iSBN: 0022-1694 Publisher: Elsevier B.V., 2009.
- 435 Horton, P., Schaefli, B., and Kuzlaric, M.: Why do we have so many different hydrological models? A review based on the case of Switzerland, *WIREs Water*, 9, e1574, <https://doi.org/10.1002/wat2.1574>, 2022.
- Höge, M., Guthke, A., and Nowak, W.: The hydrologist's guide to Bayesian model selection, averaging and combination, *Journal of Hydrology*, 572, 96–107, <https://doi.org/https://doi.org/10.1016/j.jhydrol.2019.01.072>, 2019.
- Johnson, J. M., Fang, S., Sankarasubramanian, A., Rad, A. M., Kindl Da Cunha, L., Jennings, K. S., Clarke, K. C., Mazrooei, A., and  
440 Yeghiazarian, L.: Comprehensive Analysis of the NOAA National Water Model: A Call for Heterogeneous Formulations and Diagnostic Model Selection, *Journal of Geophysical Research: Atmospheres*, 128, e2023JD038 534, <https://doi.org/10.1029/2023JD038534>, 2023.
- Kavetski, D., Kuczera, G., and Franks, S. W.: Bayesian analysis of input uncertainty in hydrological modeling: 1. Theory, *Water Resources Research*, 42, 2005WR004 368, <https://doi.org/10.1029/2005WR004368>, 2006a.
- Kavetski, D., Kuczera, G., and Franks, S. W.: Bayesian analysis of input uncertainty in hydrological modeling: 2. Application, *Water Re-*  
445 *sources Research*, 42, 2005WR004 376, <https://doi.org/10.1029/2005WR004376>, 2006b.
- Kelleher, C., McGlynn, B., and Wagener, T.: Characterizing and reducing equifinality by constraining a distributed catchment model with regional signatures, local observations, and process understanding, *Hydrology and Earth System Sciences*, 21, 3325–3352, <https://doi.org/10.5194/hess-21-3325-2017>, 2017.
- Khatami, S., Peel, M. C., Peterson, T. J., and Western, A. W.: Equifinality and Flux Mapping: A New Approach to Model Evaluation and  
450 *Process Representation Under Uncertainty*, *Water Resources Research*, 55, 8922–8941, <https://doi.org/10.1029/2018WR023750>, 2019.
- Kirchner, J. W.: Getting the right answers for the right reasons: Linking measurements, analyses, and models to advance the science of hydrology, *Water Resources Research*, 42, n/a–n/a, <https://doi.org/10.1029/2005WR004362>, 2006.
- Klotz, D., Kratzert, F., Gauch, M., Keefe Sampson, A., Brandstetter, J., Klambauer, G., Hochreiter, S., and Nearing, G.: Uncertainty estimation with deep learning for rainfall–runoff modeling, *Hydrology and Earth System Sciences*, 26, 1673–1693, [https://doi.org/10.5194/hess-](https://doi.org/10.5194/hess-26-1673-2022)  
455 *26-1673-2022*, 2022.
- Knoben, W.: CH-Earth/multi-model-mosaic-paper: Peer review release, <https://doi.org/10.5281/zenodo.13515769>, 2024.
- Knoben, W., Woods, R., Freer, J., Peel, M., and Keirnan Fowler: Data from "A brief analysis of conceptual model structure uncertainty using 36 models and 559 catchments", <https://doi.org/10.5523/BRIS.2ZUTXH2QE6P6Y2CY6SCW6K9EQJ>, 2019a.
- Knoben, W. J. M., Freer, J. E., Fowler, K. J. A., Peel, M. C., and Woods, R. A.: Modular Assessment of Rainfall–Runoff Models Toolbox (MARRMoT) v1.2: an open-source, extendable framework providing implementations of 46 conceptual hydrologic models as continuous  
460 *state-space formulations*, *Geoscientific Model Development*, 12, 2463–2480, <https://doi.org/10.5194/gmd-12-2463-2019>, 2019b.
- Knoben, W. J. M., Freer, J. E., Peel, M. C., Fowler, K. J. A., and Woods, R. A.: A Brief Analysis of Conceptual Model Structure Uncertainty Using 36 Models and 559 Catchments, *Water Resources Research*, 56, e2019WR025 975, <https://doi.org/10.1029/2019WR025975>, 2020.
- Kratzert, F., Klotz, D., Shalev, G., Klambauer, G., Hochreiter, S., and Nearing, G.: Towards learning universal, regional, and local hydrological behaviors via machine learning applied to large-sample datasets, *Hydrology and Earth System Sciences*, 23, 5089–5110,  
465 <https://doi.org/10.5194/hess-23-5089-2019>, 2019.



- Krueger, T., Freer, J., Quinton, J. N., Macleod, C. J. A., Bilotta, G. S., Brazier, R. E., Butler, P., and Haygarth, P. M.: Ensemble evaluation of hydrological model hypotheses, *Water Resources Research*, 46, 1–17, <https://doi.org/10.1029/2009WR007845>, ISBN: 0043-1397, 2010.
- Lamontagne, J. R., Barber, C. A., and Vogel, R. M.: Improved Estimators of Model Performance Efficiency for Skewed Hydrologic Data, *Water Resources Research*, 56, e2020WR027101, <https://doi.org/10.1029/2020WR027101>, 2020.
- 470 Lane, R. A., Coxon, G., Freer, J. E., Wagener, T., Johnes, P. J., Bloomfield, J. P., Greene, S., Macleod, C. J. A., and Reaney, S. M.: Benchmarking the predictive capability of hydrological models for river flow and flood peak predictions across a large-sample of catchments in Great Britain, <https://doi.org/10.5194/hess-2018-635>, 2019.
- Mai, J., Craig, J. R., Tolson, B. A., and Arsenault, R.: The sensitivity of simulated streamflow to individual hydrologic processes across  
475 North America, *Nature Communications*, 13, 455, <https://doi.org/10.1038/s41467-022-28010-7>, 2022a.
- Mai, J., Shen, H., Tolson, B. A., Gaborit, E., Arsenault, R., Craig, J. R., Fortin, V., Fry, L. M., Gauch, M., Klotz, D., Kratzert, F., O'Brien, N., Princz, D. G., Rasiya Koya, S., Roy, T., Seglenieks, F., Shrestha, N. K., Temgoua, A. G. T., Vionnet, V., and Waddell, J. W.: The Great Lakes Runoff Intercomparison Project Phase 4: the Great Lakes (GRIP-GL), *Hydrology and Earth System Sciences*, 26, 3537–3572, <https://doi.org/10.5194/hess-26-3537-2022>, 2022b.
- 480 Mcglynn, B. L., McDonnell, J. J., and Brammer, D. D.: A review of the evolving perceptual model of hillslope flowpaths at the Maimai catchments, New Zealand, *Journal of Hydrology*, 257, ISBN: 1541737431, 2002.
- McMillan, H., Araki, R., Gnann, S., Woods, R., and Wagener, T.: How do hydrologists perceive watersheds? A survey and analysis of perceptual model figures for experimental watersheds, *Hydrological Processes*, 37, e14845, <https://doi.org/10.1002/hyp.14845>, 2023.
- Nash, J. and Sutcliffe, J.: River flow forecasting through conceptual models part I — A discussion of principles, *Journal of Hydrology*, 10,  
485 282–290, [https://doi.org/10.1016/0022-1694\(70\)90255-6](https://doi.org/10.1016/0022-1694(70)90255-6), 1970.
- Newman, A., Sampson, K., Clark, M. P., Bock, A., Viger, R. J., and Blodgett, D.: A large-sample watershed-scale hydrometeorological dataset for the contiguous USA, <https://doi.org/10.5065/D6MW2F4D>, 2014.
- Newman, A. J., Clark, M. P., Sampson, K., Wood, A., Hay, L. E., Bock, A., Viger, R. J., Blodgett, D., Brekke, L., Arnold, J. R., Hopson, T., and Duan, Q.: Development of a large-sample watershed-scale hydrometeorological data set for the contiguous USA: data set characteristics and assessment of regional variability in hydrologic model performance, *Hydrology and Earth System Sciences*, 19, 209–223,  
490 <https://doi.org/10.5194/hess-19-209-2015>, 2015.
- Ogden, F., Avant, B., Bartel, R., Blodgett, D., Clark, E., Coon, E., Cosgrove, B., Cui, S., Kindl da Cunha, L., Farthing, M., Flowers, T., Frame, J., Frazier, N., Graziano, T., Gutenson, J., Johnson, D., McDaniel, R., Moulton, J., Loney, D., Peckham, S., Mattern, D., Jennings, K., Williamson, M., Savant, G., Tubbs, C., Garrett, J., Wood, A., and Johnson, J.: The Next Generation Water Resources Modeling  
495 Framework: Open Source, Standards Based, Community Accessible, Model Interoperability for Large Scale Water Prediction, in: AGU Fall Meeting Abstracts, vol. 2021, pp. H43D–01, 2021.
- Perrin, C., Michel, C., and Andréassian, V.: Does a large number of parameters enhance model performance? Comparative assessment of common catchment model structures on 429 catchments, *Journal of Hydrology*, 242, 275–301, [https://doi.org/10.1016/S0022-1694\(00\)00393-0](https://doi.org/10.1016/S0022-1694(00)00393-0), ISBN: 0022-1694, 2001.
- 500 Pushpalatha, R., Perrin, C., Moine, N. L., and Andréassian, V.: A review of efficiency criteria suitable for evaluating low-flow simulations, *Journal of Hydrology*, 420–421, 171–182, <https://doi.org/10.1016/j.jhydrol.2011.11.055>, publisher: Elsevier B.V., 2012.
- Renard, B., Kavetski, D., Kuczera, G., Thyer, M., and Franks, S. W.: Understanding predictive uncertainty in hydrologic modeling: The challenge of identifying input and structural errors, *Water Resources Research*, 46, 2009WR008328, <https://doi.org/10.1029/2009WR008328>, 2010.



- 505 Schöniger, A., Wöhling, T., Samaniego, L., and Nowak, W.: Model selection on solid ground: Rigorous comparison of nine ways to evaluate Bayesian model evidence, *Water Resources Research*, 50, 9484–9513, <https://doi.org/10.1002/2014WR016062>, 2014.
- Seiller, G., Anctil, F., and Perrin, C.: Multimodel evaluation of twenty lumped hydrological models under contrasted climate conditions, *Hydrology and Earth System Sciences*, 16, 1171–1189, <https://doi.org/10.5194/hess-16-1171-2012>, 2012.
- 510 Shen, C., Appling, A. P., Gentine, P., Bandai, T., Gupta, H., Tartakovsky, A., Baity-Jesi, M., Fenicia, F., Kifer, D., Li, L., Liu, X., Ren, W., Zheng, Y., Harman, C. J., Clark, M., Farthing, M., Feng, D., Kumar, P., Aboelyazeed, D., Rahmani, F., Song, Y., Beck, H. E., Bindas, T., Dwivedi, D., Fang, K., Höge, M., Rackauckas, C., Mohanty, B., Roy, T., Xu, C., and Lawson, K.: Differentiable modelling to unify machine learning and physical models for geosciences, *Nature Reviews Earth & Environment*, 4, 552–567, <https://doi.org/10.1038/s43017-023-00450-9>, 2023.
- 515 Song, Y., Knoben, W. J. M., Clark, M. P., Feng, D., Lawson, K., Sawadekar, K., and Shen, C.: When ancient numerical demons meet physics-informed machine learning: adjoint-based gradients for implicit differentiable modeling, *Hydrology and Earth System Sciences*, 28, 3051–3077, <https://doi.org/10.5194/hess-28-3051-2024>, 2024.
- Spieler, D. and Schütze, N.: Investigating the Model Hypothesis Space: Benchmarking Automatic Model Structure Identification With a Large Model Ensemble, *Water Resources Research*, 60, e2023WR036199, <https://doi.org/10.1029/2023WR036199>, 2024.
- 520 Spieler, D., Mai, J., Craig, J. R., Tolson, B. A., and Schütze, N.: Automatic Model Structure Identification for Conceptual Hydrologic Models, *Water Resources Research*, 56, e2019WR027009, <https://doi.org/10.1029/2019WR027009>, 2020.
- Thyer, M., Renard, B., Kavetski, D., Kuczera, G., Franks, S. W., and Srikanthan, S.: Critical evaluation of parameter consistency and predictive uncertainty in hydrological modeling: A case study using Bayesian total error analysis, *Water Resources Research*, 45, 2008WR006825, <https://doi.org/10.1029/2008WR006825>, 2009.
- 525 Troin, M., Martel, J.-L., Arsenault, R., and Brissette, F.: Large-sample study of uncertainty of hydrological model components over North America, *Journal of Hydrology*, 609, 127766, <https://doi.org/10.1016/j.jhydrol.2022.127766>, 2022.
- Van Esse, W. R., Perrin, C., Booij, M. J., Augustijn, D. C. M., Fenicia, F., Kavetski, D., and Lobligeois, F.: The influence of conceptual model structure on model performance: A comparative study for 237 French catchments, *Hydrology and Earth System Sciences*, 17, 4227–4239, <https://doi.org/10.5194/hess-17-4227-2013>, ISBN: 1607-7938, 2013.
- 530 Vrugt, J. A., Gupta, H. V., Bouten, W., and Sorooshian, S.: A Shuffled Complex Evolution Metropolis algorithm for optimization and uncertainty assessment of hydrologic model parameters, *Water Resources Research*, 39, 2002WR001642, <https://doi.org/10.1029/2002WR001642>, 2003.
- Vrugt, J. A., Ter Braak, C. J. F., Clark, M. P., Hyman, J. M., and Robinson, B. A.: Treatment of input uncertainty in hydrologic modeling: Doing hydrology backward with Markov chain Monte Carlo simulation, *Water Resources Research*, 44, 2007WR006720, <https://doi.org/10.1029/2007WR006720>, 2008.
- 535 Wood, E. F., Roundy, J. K., Troy, T. J., van Beek, L. P. H., Bierkens, M. F. P., Blyth, E., de Roo, A., Döll, P., Ek, M., Famiglietti, J., Gochis, D., van de Giesen, N., Houser, P., Jaffé, P. R., Kollet, S., Lehner, B., Lettenmaier, D. P., Peters-Lidard, C., Sivapalan, M., Sheffield, J., Wade, A., and Whitehead, P.: Hyperresolution global land surface modeling: Meeting a grand challenge for monitoring Earth's terrestrial water, *Water Resources Research*, 47, W05301, <https://doi.org/10.1029/2010WR010090>, 2011.
